# Supplementary material
Source: PubMed Central journal article supplement (PMC6436021)
Supplement: Supp_Figure1.pdf [file Supp_Figure1.pdf]

## Supplementary Data

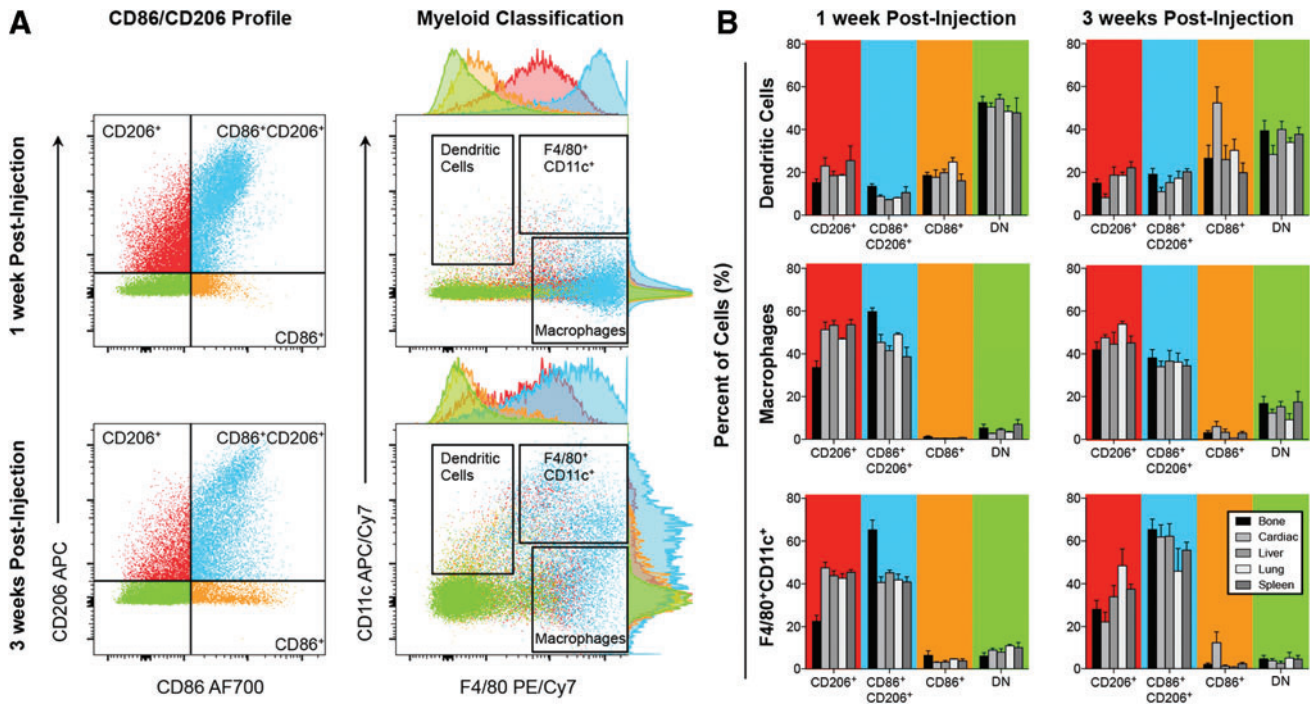

**SUPPLEMENTARY FIG. S1.** Percent positive populations for M1 and M2 markers. Mean fluorescence intensity (Fig. 4) analyses are recapitulated in the percent of cells that are positive for M1 (CD86) and M2 (CD206) markers. (A) Also, this reveals that the CD86<sup>+</sup>CD206<sup>+</sup> cells are mainly F4/80<sup>hi</sup> or mature macrophages, whereas those that are CD206<sup>-</sup>, CD86<sup>-</sup>, or CD206<sup>-</sup>CD86<sup>-</sup> are F4/80<sup>-</sup>. (B) Quantification of data displayed in (A).
