# Supplementary material
Source: PubMed Central journal article supplement (PMC6436021)
Supplement: Supp_Figure2.pdf [file Supp_Figure2.pdf]

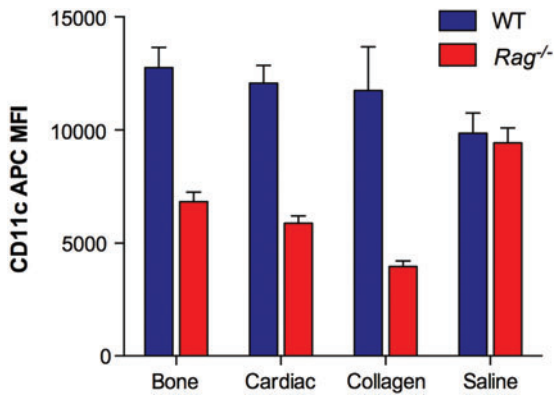

**SUPPLEMENTARY FIG. S2.** CD11c expression on SAMs is regulated by adaptive immune cells. CD11c is expressed on many macrophages in the scaffold immune microenvironment. In wild type (WT) mice (*blue bars*), the expression (mean fluorescence intensity; MFI) is slightly higher in scaffold-treated animals compared to the saline-treated control. In *RagI*<sup>-/-</sup> mice (*red bars*), which lack both T and B cells, the scaffold-associated CD11c expression is lost and falls to levels lower than the saline control. Data are mean  $\pm$  SEM. SAM, scaffold-associated macrophage; SEM, standard error of the mean.
