# Supplementary material
Source: PubMed Central journal article supplement (PMC6436021)
Supplement: Supp_Figure3.pdf [file Supp_Figure3.pdf]

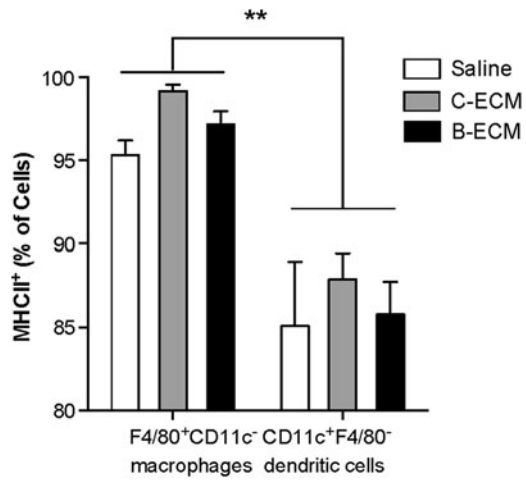

**SUPPLEMENTARY FIG. S3.** MHCII is expressed highly on F4/80<sup>+</sup> macrophages and CD11c<sup>+</sup> dendritic cells. There is a higher level of MHCII expression on F4/80<sup>+</sup> macrophages compared to the canonical antigen-presenting CD11c<sup>+</sup> dendritic cells. Saline = *white bars*; cardiac ECM (C-ECM) = *grey bars*; bone ECM (B-ECM) = *black bars*. Data are mean  $\pm$  SEM. \*\*ANOVA  $p < 0.01$ . ANOVA, analysis of variance; ECM, extracellular matrix.
