# Supplementary material
Source: PubMed Central journal article supplement (PMC6436021)
Supplement: Supp_Figure4.pdf [file Supp_Figure4.pdf]

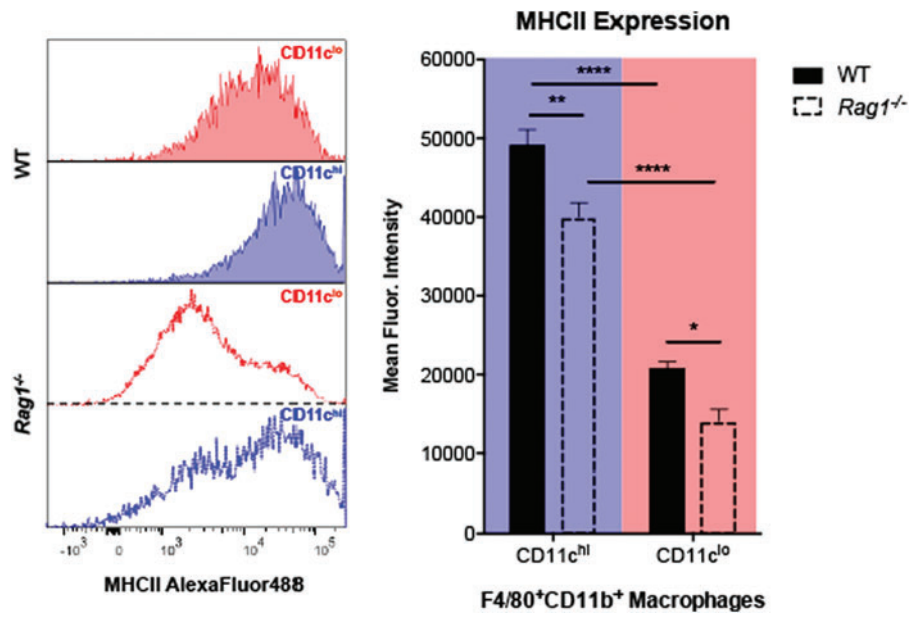

**SUPPLEMENTARY FIG. S4.** MHCII expression is decreased in the absence of adaptive immune cells. Mean fluorescence intensity of MHCII on F4/80<sup>+</sup>CD11b<sup>+</sup> macrophages that are either CD11c<sup>hi</sup> (blue) or CD11c<sup>lo</sup> (red) in wild-type (solid) or Rag1<sup>-/-</sup> (dashed) mice. Data are mean ± SEM. \**p* < 0.05; \*\**p* < 0.01; \*\*\*\**p* < 0.0001.
