# Supplementary material
Source: PubMed Central journal article supplement (PMC6436021)
Supplement: Supp_Table1.pdf [file Supp_Table1.pdf]

SUPPLEMENTARY TABLE S1. ANOVA ANALYSES FOR DATA IN FIGURE 4

|                           | Macrophages |       | Dendritic Cells |       | F4/80+CD11c+ |       |
|---------------------------|-------------|-------|-----------------|-------|--------------|-------|
|                           | CD86        | CD206 | CD86            | CD206 | CD86         | CD206 |
| <b>1 week</b>             |             |       |                 |       |              |       |
| BONE vs. HEART            | *           | ns    | ns              | ns    | ***          | ns    |
| BONE vs. LIVER            | **          | ns    | ns              | ns    | ***          | ns    |
| BONE vs. LUNG             | **          | ns    | ns              | ns    | ***          | ns    |
| BONE vs. SPLEEN           | **          | ns    | ns              | ns    | ***          | ns    |
| HEART vs. LIVER           | ns          | ns    | ns              | ns    | ns           | ns    |
| HEART vs. LUNG            | ns          | ns    | ns              | ns    | ns           | ns    |
| HEART vs. SPLEEN          | ns          | ns    | ns              | ns    | ns           | ns    |
| LIVER vs. LUNG            | ns          | ns    | ns              | ns    | ns           | ns    |
| LIVER vs. SPLEEN          | ns          | ns    | ns              | ns    | ns           | ns    |
| LUNG vs. SPLEEN           | ns          | ns    | ns              | ns    | ns           | ns    |
| <b>3 weeks</b>            |             |       |                 |       |              |       |
| BONE vs. HEART            | ns          | ns    | ns              | ns    | ns           | ns    |
| BONE vs. LIVER            | ns          | ns    | ns              | ns    | ns           | ns    |
| BONE vs. LUNG             | ns          | ns    | ns              | ns    | ns           | ns    |
| BONE vs. SPLEEN           | ns          | ns    | ns              | ns    | ns           | ns    |
| HEART vs. LIVER           | ns          | ns    | *               | ns    | ns           | ns    |
| HEART vs. LUNG            | ns          | **    | *               | *     | *            | ns    |
| HEART vs. SPLEEN          | ns          | ns    | *               | ns    | *            | ns    |
| LIVER vs. LUNG            | ns          | *     | ns              | ns    | ns           | ns    |
| LIVER vs. SPLEEN          | ns          | ns    | ns              | ns    | ns           | ns    |
| LUNG vs. SPLEEN           | ns          | **    | ns              | ns    | ns           | ns    |
| Main                      | ***         | **    | ns              | ns    | ***          | ns    |
| <b>1 week vs. 3 weeks</b> |             |       |                 |       |              |       |
| BONE                      | ns          | ns    | ns              | ns    | *            | ns    |
| HEART                     | ns          | ns    | ***             | ns    | **           | ns    |
| LIVER                     | ns          | ns    | ns              | ns    | ns           | ns    |
| LUNG                      | ns          | ns    | ns              | *     | ns           | ns    |
| SPLEEN                    | ns          | ns    | ns              | ns    | ns           | ns    |
| Main                      | ns          | ns    | ***             | ns    | ns           | *     |
| Interaction               | ns          | *     | ns              | ns    | **           | ns    |

\* $p < 0.05$ , \*\* $p < 0.01$ , \*\*\* $p < 0.001$ , \*\*\*\* $p < 0.0001$ .  
ANOVA, analysis of variance.
